# Supplementary material
Source: Springer Nature journal article supplement (https://www.springermedizin.de/resource/supplementary/12904_2008_55_MOESM4_ESM.pdf/9518044)

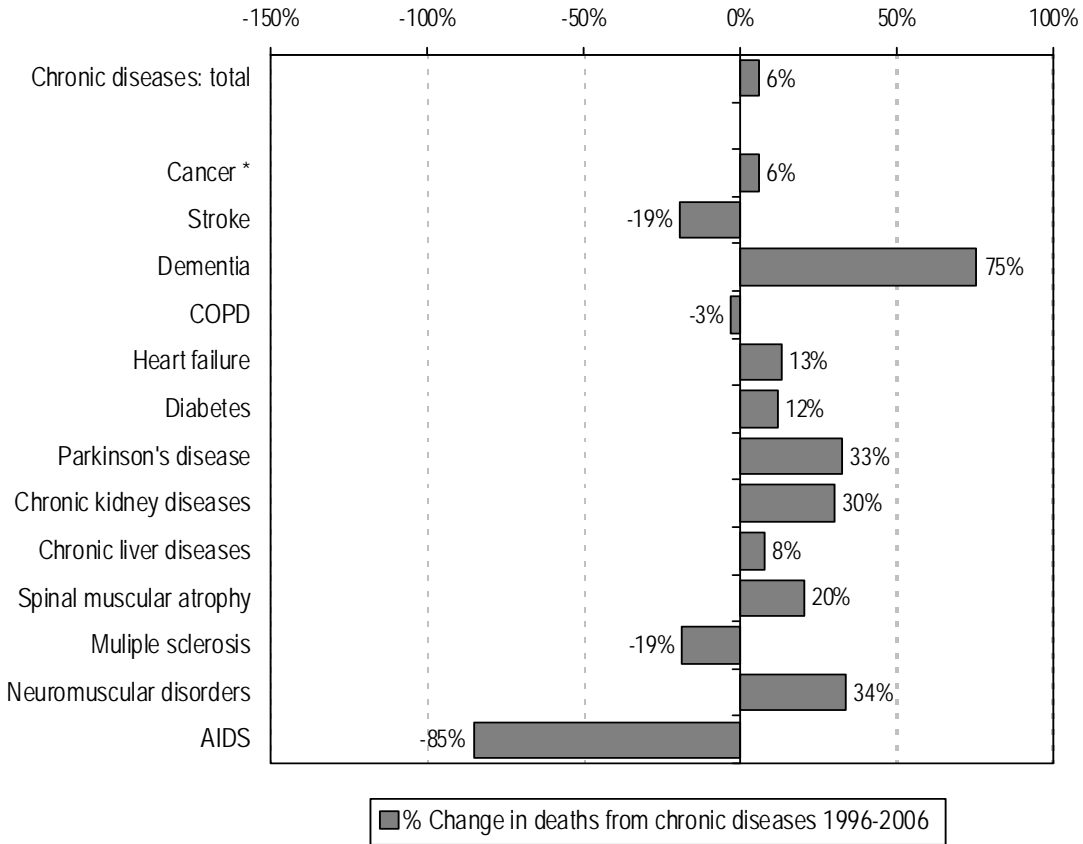

Supplement: MOESM4 [file 9518044]
